# Supplementary material for: A Novel Antimicrobial Peptide (Kassinatuerin-3) Isolated from the Skin Secretion of the African Frog, Kassina senegalensis
Source: PubMed Central journal article supplement (PMC7408539; doi:10.3390/biology9070148), 2020-07-02
Supplement: biology-09-00148-s001.pdf [file biology-09-00148-s001.pdf]

# A novel antimicrobial peptide (kassinatuerin-3) isolated from the skin secretion of the African frog, *Kassina senegalensis*

Supplementary Materials

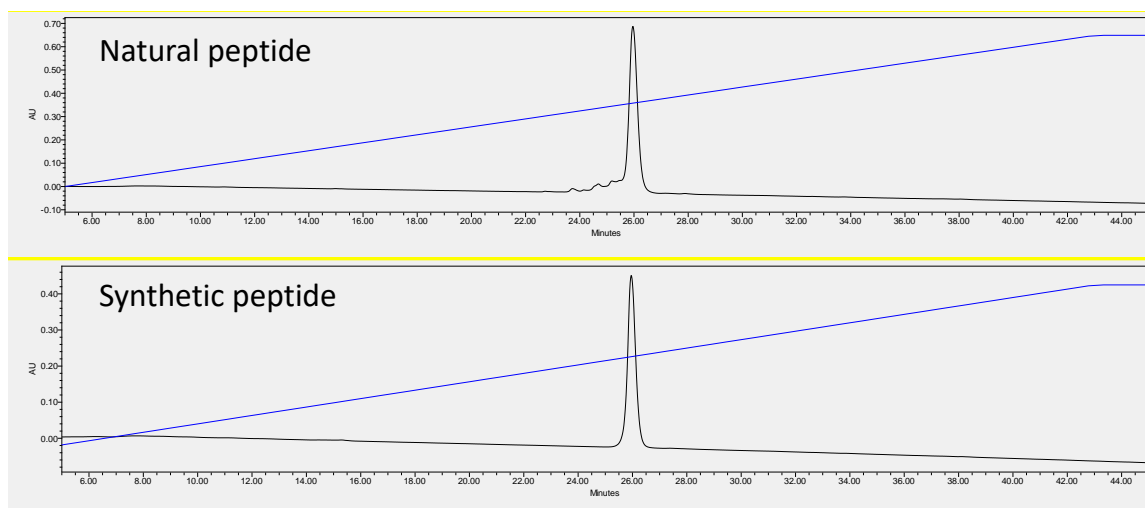

**Figure S1.** The chromatograms of the isolated kassinatuerin-3 from the skin secretion and the purified synthetic replicates. The gradient of mobile phase is indicated by the blue line.

ITMS, CID, z=+2, Mono m/z=1156.62000 Da, MH+=2312.23272 Da, Match Tol.=0.8 Da

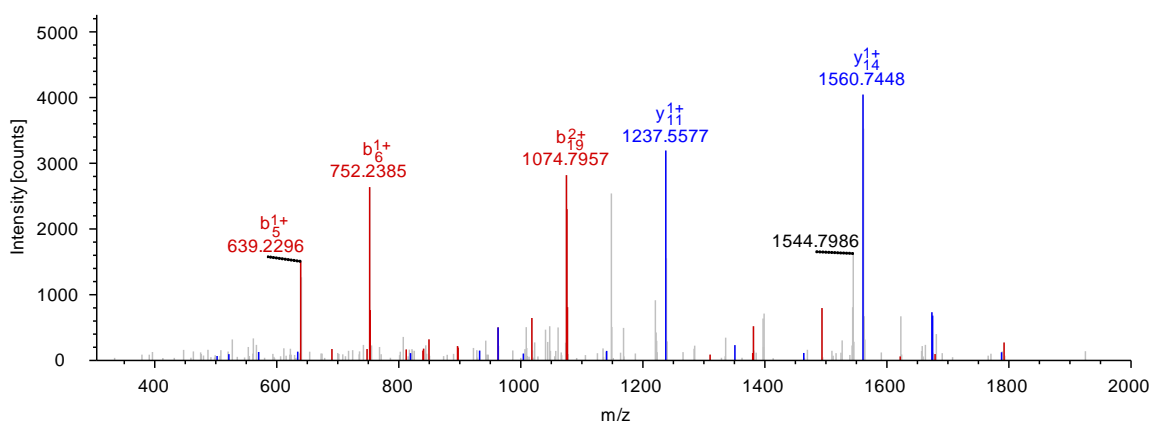

**Figure S2.** MS/MS spectrum of synthetic kassinatuerin-3 that is consistent with the one of natural peptide from the skin secretion.

**Table S1.** The calculated IC<sub>50</sub> and SD<sub>LogIC<sub>50</sub></sub> of kassinatuerin-3 against each cell line. The tukey's test for the LogIC<sub>50</sub> of each cell line is showed below. The significance was indicated as  $p < 0.0001$  (\*\*\*\*),  $p < 0.001$  (\*\*\*) ,  $p < 0.01$  (\*\*) ,  $p < 0.05$  (\*) and no significance (ns).

|                                  | U251MG  | LnCap  | H838    | H460    | H157   | H23     |
|----------------------------------|---------|--------|---------|---------|--------|---------|
| IC <sub>50</sub> (μM)            | 13.20   | 3.79   | 10.03   | 1.67    | 21.54  | 4.52    |
| SD <sub>LogIC<sub>50</sub></sub> | 0.03648 | 0.1340 | 0.07557 | 0.04799 | 0.1050 | 0.09546 |

| <b>Tukey's multiple comparisons test</b> | <b>Mean Diff.</b> | <b>95% CI of diff.</b> | <b>Summary</b> |
|------------------------------------------|-------------------|------------------------|----------------|
| U251MG vs. LnCap                         | 0.541             | 0.470 to 0.613         | ****           |
| U251MG vs. H838                          | 0.541             | 0.472 to 0.610         | ****           |
| U251MG vs. H460                          | 0.541             | 0.476 to 0.607         | ****           |
| U251MG vs. H157                          | -0.213            | -0.282 to -0.144       | ****           |
| U251MG vs. H23                           | 0.464             | 0.394 to 0.535         | ****           |
| LnCap vs. H838                           | 0.0               | -0.0690 to 0.0690      | ns             |
| LnCap vs. H460                           | 0.0               | -0.0657 to 0.0657      | ns             |
| LnCap vs. H157                           | -0.754            | -0.823 to -0.685       | ****           |
| LnCap vs. H23                            | -0.0770           | -0.147 to -0.00695     | *              |
| H838 vs. H460                            | 0.0               | -0.0632 to 0.0632      | ns             |
| H838 vs. H157                            | -0.754            | -0.821 to -0.688       | ****           |
| H838 vs. H23                             | -0.0770           | -0.145 to -0.00925     | *              |
| H460 vs. H157                            | -0.754            | -0.817 to -0.691       | ****           |
| H460 vs. H23                             | -0.0770           | -0.141 to -0.0126      | **             |
| H157 vs. H23                             | 0.677             | 0.609 to 0.745         | ****           |

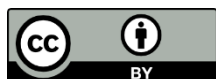

© 2020 by the authors. Submitted for possible open access publication under the terms and conditions of the Creative Commons Attribution (CC BY) license (<http://creativecommons.org/licenses/by/4.0/>).
